# Supplementary material
Source: PubMed Central journal article supplement (PMC5036356)
Supplement: supp_D069831_Supplemental_D069831-edited.pdf [file supp_D069831_Supplemental_D069831-edited.pdf]

**Supplemental Table S1. Typical MRM ion pairs for establishment of comprehensive profile of urinary bile acids in piglets**

| Forms of conjugates | Negative ion mode        |                            |                            |                          |                             |                            |                              |                       |
|---------------------|--------------------------|----------------------------|----------------------------|--------------------------|-----------------------------|----------------------------|------------------------------|-----------------------|
|                     | TetraOH BA               | TriOH BA                   | DiOH BA                    | MonoOH BA                | TriOH BA- $\Delta^4$ -3-one | DiOH BA- $\Delta^4$ -3-one | MonoOH BA- $\Delta^4$ -3-one | BA- $\Delta^4$ -3-one |
| Free BAs            | 423.4 <sup>1</sup>       | 407.4 <sup>1</sup>         | 391.4 <sup>1</sup>         | 375.4 <sup>1</sup>       | 419.4 <sup>1</sup>          | 403.4 <sup>1</sup>         | 387.4 <sup>1</sup>           | 371.4 <sup>1</sup>    |
|                     | 423.4/405.3              | 407.4/343.2<br>407.4/389.4 | 391.4/373.2<br>391.4/345.5 | 375.4/357.2              |                             | 403.4/123.1                | 387.4/369.4                  |                       |
| T-BAs               | 530.6/124.0              | 514.6/124.0                | 498.6/124.0                | 482.6/124.0              | 526.6/124.0                 | 510.6/124.0                | 494.6/124.0                  | 478.6/124.0           |
| G-BAs               | 480.6/74.0               | 464.6/74.0                 | 448.6/74.0                 | 432.6/74.0               | 476.6/74.0                  | 460.6/74.0                 | 444.6/74.0                   | 428.6/74.0            |
| BA-S                | 503.6/97.0               | 487.6/97.0                 | 471.6/97.0                 | 455.6/97.0               | 499.6/97.0                  | 483.6/97.0                 | 467.6/97.0                   |                       |
| T-BA-S              | 304.9 <sup>2</sup> /97.0 | 296.9 <sup>2</sup> /97.0   | 288.9 <sup>2</sup> /97.0   | 280.9 <sup>2</sup> /97.0 | 302.9 <sup>2</sup> /97.0    | 294.9 <sup>2</sup> /97.0   | 286.9 <sup>2</sup> /97.0     |                       |
|                     | 610.8/97.0               | 594.8/97.0                 | 578.8/97.0                 | 562.8/97.0               | 606.7/97.0                  | 590.7/97.0                 | 574.7/97.0                   |                       |
|                     | 610.8/124.0              | 594.8/124.0                | 578.8/124.0                | 562.8/124.0              | 606.7/124.0                 | 590.7/124.0                | 574.7/124.0                  |                       |
| G-BA-S              | 279.8 <sup>2</sup> /97.0 | 271.8 <sup>2</sup> /97.0   | 263.8 <sup>2</sup> /97.0   | 255.8 <sup>2</sup> /97.0 | 277.8 <sup>2</sup> /97.0    | 269.8 <sup>2</sup> /97.0   | 261.8 <sup>2</sup> /97.0     |                       |
|                     | 560.7/97.0               | 544.7/97.0                 | 528.7/97.0                 | 512.7/97.0               | 556.7/97.0                  | 540.7/97.0                 | 524.7/97.0                   |                       |
|                     | 560.7/74.0               | 544.7/74.0                 | 528.7/74.0                 | 512.7/74.0               | 556.7/74.0                  | 540.7/74.0                 | 524.7/74.0                   |                       |
| BA-GlcUA            | 599.7/423.4              | 583.7/407.4                | 567.7/391.4                | 551.7/375.4              | 595.7/419.4                 | 579.7/403.4                | 563.7/387.4                  |                       |
| T-BA-GlcUA          | 706.8/124.0              | 690.8/124.0                | 674.8/124.0                | 658.8/124.0              | 702.8/124.0                 | 686.8/124.0                | 670.8/124.0                  |                       |
|                     | 706.8/423.4              | 690.8/407.4                | 674.8/391.4                | 658.8/375.4              | 702.8/419.4                 | 686.8/403.4                | 670.8/387.4                  |                       |
| G-BA-GlcUA          | 656.7/74.0               | 640.7/74.0                 | 624.7/74.0                 | 608.7/74.0               | 652.7/74.0                  | 636.7/74.0                 | 620.7/74.0                   |                       |
|                     | 656.7/423.4              | 640.7/407.4                | 624.7/391.4                | 608.7/375.4              | 652.7/419.4                 | 636.7/403.4                | 620.7/387.4                  |                       |
| BA-GlcNAc           | 626.8/423.4              | 610.8/407.4                | 594.8/391.4                | 578.8/375.4              | 622.7/419.4                 | 606.7/403.4                | 590.7/387.4                  |                       |
| T-BA-GlcNAc         | 733.9/124.0              | 717.9/124.0                | 701.9/124.0                | 685.9/124.0              | 729.9/124.0                 | 713.9/124.0                | 697.9/124.0                  |                       |
|                     | 733.9/423.4              | 717.9/407.4                | 701.9/391.4                | 685.9/375.4              | 729.9/419.4                 | 713.9/403.4                | 697.9/387.4                  |                       |
| G-BA-GlcNAc         | 683.8/74.0               | 667.8/74.0                 | 651.8/74.0                 | 635.8/74.0               | 679.8/74.0                  | 663.8/74.0                 | 647.8/74.0                   |                       |
|                     | 683.8/423.4              | 667.8/407.4                | 651.8/391.4                | 635.8/375.4              | 679.8/419.4                 | 663.8/403.4                | 647.8/387.4                  |                       |
| BA-GlcA             | 585.7/423.4              | 569.7/407.4                | 553.7/391.2                | 537.7/375.4              | 581.7/419.4                 | 565.7/403.4                | 549.7/387.4                  |                       |
| T-BA-GlcA           | 692.8/124.0              | 676.8/124.0                | 660.8/124.0                | 644.8/124.0              | 688.8/124.0                 | 672.8/124.0                | 656.8/124.0                  |                       |
|                     | 692.8/423.4              | 676.8/407.4                | 660.8/391.4                | 644.8/375.4              | 688.8/419.4                 | 672.8/403.4                | 656.8/387.4                  |                       |

|               |                          |                          |                          |             |                          |                          |             |
|---------------|--------------------------|--------------------------|--------------------------|-------------|--------------------------|--------------------------|-------------|
| G-BA-GlcA     | 642.7/74.0               | 626.7/74.0               | 610.7/74.0               | 594.7/74.0  | 638.7/74.0               | 622.7/74.0               | 606.7/74.0  |
|               | 642.7/423.4              | 626.7/407.4              | 610.7/391.4              | 594.7/375.4 | 638.7/419.4              | 622.7/403.4              | 606.7/387.4 |
| BA-S-GlcUA    | 679.8/423.4              | 663.8/407.4              | 647.8/391.4              |             | 675.7/419.4              | 659.7/403.4              |             |
|               | 679.8/97.0               | 663.8/97.0               | 647.8/97.0               |             | 675.7/97.0               | 659.7/97.0               |             |
| T-BA-S-GlcUA  | 392.9 <sup>2</sup> /97.0 | 384.9 <sup>2</sup> /97.0 | 376.9 <sup>2</sup> /97.0 |             | 390.9 <sup>2</sup> /97.0 | 382.9 <sup>2</sup> /97.0 |             |
|               | 786.8/124.0              | 770.8/124.0              | 754.8/124.0              |             | 782.8/124.0              | 766.8/124.0              |             |
| G-BA-S-GlcUA  | 367.9 <sup>2</sup> /97.0 | 359.9 <sup>2</sup> /97.0 | 351.9 <sup>2</sup> /97.0 |             | 365.9 <sup>2</sup> /97.0 | 357.8 <sup>2</sup> /97.0 |             |
|               | 736.8/74.0               | 720.8/74.0               | 704.8/74.0               |             | 732.7/74.0               | 716.7/74.0               |             |
| BA-S-GlcNAc   | 706.8/423.4              | 690.8/407.4              | 674.8/391.4              |             | 702.8/419.4              | 686.8/403.4              |             |
|               | 706.8/97.0               | 690.8/97.0               | 674.8/97.0               |             | 702.8/97.0               | 686.8/97.0               |             |
| T-BA-S-GlcNAc | 406.4 <sup>2</sup> /97.0 | 398.4 <sup>2</sup> /97.0 | 390.4 <sup>2</sup> /97.0 |             | 404.4 <sup>2</sup> /97.0 | 396.4 <sup>2</sup> /97.0 |             |
|               | 813.9/124.0              | 797.9/124.0              | 781.9/124.0              |             | 809.8/124.0              | 793.9/124.0              |             |
| G-BA-S-GlcNAc | 381.4 <sup>2</sup> /97.0 | 373.4 <sup>2</sup> /97.0 | 365.4 <sup>2</sup> /97.0 |             | 379.4 <sup>2</sup> /97.0 | 371.4 <sup>2</sup> /97.0 |             |
|               | 763.8/74.0               | 747.8/74.0               | 731.8/74.0               |             | 759.8/74.0               | 743.8/74.0               |             |
| BA-S-GlcA     | 665.8/423.4              | 649.8/407.4              | 633.8/391.4              |             | 661.7/419.4              | 645.7/403.4              |             |
|               | 665.8/97.0               | 649.8/97.0               | 633.8/97.0               |             | 661.7/97.0               | 645.7/97.0               |             |
| T-BA-S-GlcA   | 385.9 <sup>2</sup> /97.0 | 377.9 <sup>2</sup> /97.0 | 369.9 <sup>2</sup> /97.0 |             | 383.9 <sup>2</sup> /97.0 | 375.9 <sup>2</sup> /97.0 |             |
|               | 772.9/124.0              | 756.9/124.0              | 740.9/124.0              |             | 768.8/124.0              | 752.8/124.0              |             |
| G-BA-S-GlcA   | 360.9 <sup>2</sup> /97.0 | 352.9 <sup>2</sup> /97.0 | 344.9 <sup>2</sup> /97.0 |             | 358.9 <sup>2</sup> /97.0 | 350.9 <sup>2</sup> /97.0 |             |
|               | 722.8/74.0               | 706.8/74.0               | 690.8/74.0               |             | 718.8/74.0               | 702.8/74.0               |             |
|               | 722.8/97.0               | 706.8/97.0               | 690.8/97.0               |             | 718.8/97.0               | 702.8/97.0               |             |

<sup>1</sup> A selected ion [M-H]<sup>-</sup> was used to monitor unconjugated BAs.

<sup>2</sup> The ion is doubly charged ion, [M-2H]<sup>2-</sup>.

**Supplemental Table S2. Calibration curves and quantitation of urinary bile acids**

| No. in Table 1 | Standards              | Equation                | Correlation Coefficient (R <sup>2</sup> ) | For quantitation of BAs (No. in Table 1) |
|----------------|------------------------|-------------------------|-------------------------------------------|------------------------------------------|
| 5, S1          | ωMCA                   | $y = 406.68x - 0.3232$  | 0.9999                                    | 1-6, 17-19, 52-57                        |
| 7, S4          | γMCA                   | $y = 350.02x - 22.6950$ | 0.9999                                    | 7                                        |
| 9, S7          | T-βMCA                 | $y = 24074x + 8.2243$   | 0.9998                                    | 8-10                                     |
| S8             | T-γMCA                 | $y = 16674x + 2.0412$   | 0.9997                                    | 20-25, 20a, 25a, 58                      |
| 16, S10        | G-γMCA                 | $y = 389.61x + 0.2528$  | 1.000                                     | 11-16, 59-76,                            |
| 26, S12        | MDCA                   | $y = 620.8x - 1.8310$   | 0.9998                                    | 26                                       |
| 27, S14        | HDCA                   | $y = 612.73x - 2.4817$  | 0.9998                                    | 27                                       |
| 28, S16        | CDCA                   | $y = 738.39x - 6.5608$  | 0.9997                                    | 28                                       |
| 29, S17        | DCA                    | $y = 152.81x - 0.8603$  | 1.000                                     | 29                                       |
| 32, S24        | G-HDCA                 | $y = 281.58x - 0.9227$  | 0.9999                                    | 30-32, 34-38, 40-42, 42a                 |
| 33, S25        | G-CDCA                 | $y = 344.82x - 2.6177$  | 0.9998                                    | 33,39                                    |
| 45, S28        | CDCA-3S disodium salt  | $y = 372.69x - 2.9111$  | 0.9998                                    | 43-51                                    |
| 77, S29        | alloLCA                | $y = 1880.4x - 2.6415$  | 0.9995                                    | 77                                       |
| 78, S31        | LCA                    | $y = 866.84x + 0.2139$  | 1.0000                                    | 78                                       |
| S32            | T-LCA                  | $y = 53306x - 36.9860$  | 0.9998                                    | 82-86                                    |
| S33            | G-LCA                  | $y = 336.31x - 3.6079$  | 0.9999                                    | 79-80                                    |
| S34            | G-LCA-3S disodium salt | $y = 4458.8x + 0.2940$  | 0.9999                                    | 81                                       |
